# Supplementary material
Source: PubMed Central journal article supplement (PMC2465662)
Supplement: supp_61_12_1069__1.pdf [file supp_61_12_1069__1.pdf]

**Table 1 – Papers on binge drinking during pregnancy. Listed alphabetically by name of 1<sup>st</sup> author. Details extracted and assessed quality using Newcastle-Ottawa Scale (maximum possible scores Selection=4, Comparability=2, Outcome =3).**

| 1 <sup>st</sup> author, year of publication, country, study type, quality assessment         | Period & numbers recruited                   | Measures of alcohol exposure and outcome                                                                                                                                                                       | Results                                                                                                                                                                                                                                                                                                                                                                                                      | Comments                                                                                                                                                                                                                                                                                                                                                                                                                                                                                                                                        |
|----------------------------------------------------------------------------------------------|----------------------------------------------|----------------------------------------------------------------------------------------------------------------------------------------------------------------------------------------------------------------|--------------------------------------------------------------------------------------------------------------------------------------------------------------------------------------------------------------------------------------------------------------------------------------------------------------------------------------------------------------------------------------------------------------|-------------------------------------------------------------------------------------------------------------------------------------------------------------------------------------------------------------------------------------------------------------------------------------------------------------------------------------------------------------------------------------------------------------------------------------------------------------------------------------------------------------------------------------------------|
| Bailey, 2004;<br>USA:<br>Cohort study<br><br>Selection=3<br>Comparability=2<br>Outcome=2     | 1989-91<br>499<br>children at<br>age 6-7 yrs | Alcohol exposure by detailed interview at each antenatal visit regarding previous 2 wks intake; outcomes assessed at research facility by researchers blind to alcohol exposure, teacher data by questionnaire | <p style="text-align: center;">Pearson correlation p-value</p> Verbal IQ           -.12       .00<br>Performance IQ   -.02       .61<br>Aggressive behaviour .07       .13<br>Delinquent behaviour .12       .01<br><br><p style="text-align: center;">Regression for           t   p-value</p> Verbal IQ               -2.47 .014<br>Delinquent behaviour   2.26 .024                                       | Study included black mothers only, over-sampled alcohol exposed pregnancies. Excluded multiples, malformations, HIV-positive. Bingeing defined as 5+ drinks on a single occasion at least once in every 2 wks during pregnancy. Follow-up 75%, no data on those lost to follow-up. Regression included quality of home environment, SES, child violence exposure, AN exposures, cigarettes and cocaine. Numerous covariates also examined. Babies of bingers had lower birthweight but birthweight was not included in the regression analysis. |
| Bell, 1989;<br>Australia;<br>Cohort study<br><br>Selection=3<br>Comparability=1<br>Outcome=3 | 1985<br>8884<br>women                        | Data from the Victorian Perinatal Morbidity Statistics (not clear whether alcohol data collected AN or PN)                                                                                                     | <p style="text-align: center;"><i>Mean birthweight (sd)</i></p> Binge drinkers       3352 (518)<br>Non-bingers (also<br>non- smokers)       3420 (556)<br>Smoking abstainers   3256 (576)<br><i>All differences significant at p&lt;0.05</i><br><br><p style="text-align: center;"><i>% Congenital malformations</i></p> Binge drinkers       1.9<br>Non-bingers           1.2<br>Abstainers             1.3 | 45% of hospitals took part of which 65% recorded smoking and alcohol details. Only adjusted for smoking (some of the time). Bingeing defined as any episode of 5+ drinks. Possible selection bias due to smoking and drinking details being less well recorded in cases of poor outcome.                                                                                                                                                                                                                                                        |

|  |  |                                                 |  |
|--|--|-------------------------------------------------|--|
|  |  | <i>No differences statistically significant</i> |  |
|--|--|-------------------------------------------------|--|

|                                                                                             |                                                                             |                                                                                                                                                                                                                                                        |                                |                     |                  |     |                                                                                                                                                                                                                                                                                                                                                                                                                                                                                                                                                                                                                                                                                                                                                                                                                                                                                                                                                                                               |
|---------------------------------------------------------------------------------------------|-----------------------------------------------------------------------------|--------------------------------------------------------------------------------------------------------------------------------------------------------------------------------------------------------------------------------------------------------|--------------------------------|---------------------|------------------|-----|-----------------------------------------------------------------------------------------------------------------------------------------------------------------------------------------------------------------------------------------------------------------------------------------------------------------------------------------------------------------------------------------------------------------------------------------------------------------------------------------------------------------------------------------------------------------------------------------------------------------------------------------------------------------------------------------------------------------------------------------------------------------------------------------------------------------------------------------------------------------------------------------------------------------------------------------------------------------------------------------------|
| Nulman, 2004;<br>Canada, Cohort<br>study<br><br>Selection=3<br>Comparability=2<br>Outcome=2 | 1987-97<br>50 women,<br>51 babies<br>assessed at<br>various<br>ages 0-9 yrs | Alcohol exposure by<br>interview antenatally;<br>outcomes assessed at<br>research facility by<br>psychometrist blind to<br>alcohol exposure<br><br>Bayley - up to 36 mths<br>(n=26)<br>McCarthy – up to 7<br>yrs (n=22)<br>Weschler - > 7 yrs<br>(n=3) |                                | Bingers             | Non-bingers      | p   | Participants were women who contacted the<br>Motherisk program out of concern at exposure<br>to alcohol or other substance. In 10 yrs only 92<br>'eligible' women identified but eligibility<br>undefined. Controls were women consulting<br>about an exposure other than alcohol (teratogens<br>excluded) matched on age, SES, smoking, time<br>of conception and child's age. No data about<br>alcohol consumption in controls. Bingers<br>(defined as any episode of 5+ drinks) were not<br>alcoholics. Numerous neuropsychological tests<br>performed and reported. Significant differences<br>appeared for 3/9 subscales on a<br>temperament/behaviour score only. Multiple<br>regression included maternal IQ, SES, Parenting<br>stress index and GA. Frequent bingers (n=12,<br>defined as >6 binges) numbers were too small to<br>be useful. Similarly there were only 3 children<br>over 7 yrs who were given the Weschler. Study<br>did not collect measures of maternal behaviour. |
|                                                                                             |                                                                             |                                                                                                                                                                                                                                                        |                                | <i>mean ± sd</i>    | <i>mean ± sd</i> |     |                                                                                                                                                                                                                                                                                                                                                                                                                                                                                                                                                                                                                                                                                                                                                                                                                                                                                                                                                                                               |
|                                                                                             |                                                                             |                                                                                                                                                                                                                                                        | Gestational age                | 39.9 ± 1.8          | 39.5 ± 1.7       | .2  |                                                                                                                                                                                                                                                                                                                                                                                                                                                                                                                                                                                                                                                                                                                                                                                                                                                                                                                                                                                               |
|                                                                                             |                                                                             |                                                                                                                                                                                                                                                        | Birthweight                    | 3390 ± 609          | 3376 ± 565       | .9  |                                                                                                                                                                                                                                                                                                                                                                                                                                                                                                                                                                                                                                                                                                                                                                                                                                                                                                                                                                                               |
|                                                                                             |                                                                             |                                                                                                                                                                                                                                                        | Weight (%ile)                  | 60.6 ± 25           | 57.9 ± 31        | .6  |                                                                                                                                                                                                                                                                                                                                                                                                                                                                                                                                                                                                                                                                                                                                                                                                                                                                                                                                                                                               |
|                                                                                             |                                                                             |                                                                                                                                                                                                                                                        | Height (%ile)                  | 55.2 ± 25           | 64.0 ± 25        | .08 |                                                                                                                                                                                                                                                                                                                                                                                                                                                                                                                                                                                                                                                                                                                                                                                                                                                                                                                                                                                               |
|                                                                                             |                                                                             |                                                                                                                                                                                                                                                        | Head circum-<br>ference (%ile) | 51.8 ± 20           | 56.6 ± 23        | .3  |                                                                                                                                                                                                                                                                                                                                                                                                                                                                                                                                                                                                                                                                                                                                                                                                                                                                                                                                                                                               |
|                                                                                             |                                                                             |                                                                                                                                                                                                                                                        |                                | Difference (95% CI) |                  |     |                                                                                                                                                                                                                                                                                                                                                                                                                                                                                                                                                                                                                                                                                                                                                                                                                                                                                                                                                                                               |
|                                                                                             |                                                                             |                                                                                                                                                                                                                                                        | Bayley MDI                     | -2.83 (-13.1, 7.5)  |                  |     |                                                                                                                                                                                                                                                                                                                                                                                                                                                                                                                                                                                                                                                                                                                                                                                                                                                                                                                                                                                               |
|                                                                                             |                                                                             |                                                                                                                                                                                                                                                        | Bayley PDI                     | -4.31 (-10.5, 1.8)  |                  |     |                                                                                                                                                                                                                                                                                                                                                                                                                                                                                                                                                                                                                                                                                                                                                                                                                                                                                                                                                                                               |
|                                                                                             |                                                                             |                                                                                                                                                                                                                                                        | McCarthy                       |                     |                  |     |                                                                                                                                                                                                                                                                                                                                                                                                                                                                                                                                                                                                                                                                                                                                                                                                                                                                                                                                                                                               |
|                                                                                             |                                                                             |                                                                                                                                                                                                                                                        | GCI                            | -5.92 (-18.9, 7.0)  |                  |     |                                                                                                                                                                                                                                                                                                                                                                                                                                                                                                                                                                                                                                                                                                                                                                                                                                                                                                                                                                                               |
|                                                                                             |                                                                             |                                                                                                                                                                                                                                                        | verbal                         | 1.93 (-4.8, 8.7)    |                  |     |                                                                                                                                                                                                                                                                                                                                                                                                                                                                                                                                                                                                                                                                                                                                                                                                                                                                                                                                                                                               |
|                                                                                             |                                                                             |                                                                                                                                                                                                                                                        | perceptual                     | -1.45 (-6.5, 3.6)   |                  |     |                                                                                                                                                                                                                                                                                                                                                                                                                                                                                                                                                                                                                                                                                                                                                                                                                                                                                                                                                                                               |
|                                                                                             |                                                                             |                                                                                                                                                                                                                                                        | quantitative                   | -0.19 (-6.5, 6.2)   |                  |     |                                                                                                                                                                                                                                                                                                                                                                                                                                                                                                                                                                                                                                                                                                                                                                                                                                                                                                                                                                                               |
| memory                                                                                      | -0.05 (-5.9, 5.6)                                                           |                                                                                                                                                                                                                                                        |                                |                     |                  |     |                                                                                                                                                                                                                                                                                                                                                                                                                                                                                                                                                                                                                                                                                                                                                                                                                                                                                                                                                                                               |
| motor                                                                                       | 0.59 (-5.5, 6.6)                                                            |                                                                                                                                                                                                                                                        |                                |                     |                  |     |                                                                                                                                                                                                                                                                                                                                                                                                                                                                                                                                                                                                                                                                                                                                                                                                                                                                                                                                                                                               |
|                                                                                             | <i>Multiple regression of no. binges on outcomes</i>                        |                                                                                                                                                                                                                                                        |                                |                     |                  |     |                                                                                                                                                                                                                                                                                                                                                                                                                                                                                                                                                                                                                                                                                                                                                                                                                                                                                                                                                                                               |
|                                                                                             | B (95% CI)                                                                  |                                                                                                                                                                                                                                                        |                                |                     |                  |     |                                                                                                                                                                                                                                                                                                                                                                                                                                                                                                                                                                                                                                                                                                                                                                                                                                                                                                                                                                                               |
| Adaptability                                                                                | 1.50 (0.52, 2.49)                                                           |                                                                                                                                                                                                                                                        |                                |                     |                  |     |                                                                                                                                                                                                                                                                                                                                                                                                                                                                                                                                                                                                                                                                                                                                                                                                                                                                                                                                                                                               |
| Approach                                                                                    | 1.69 (0.74, 2.66)                                                           |                                                                                                                                                                                                                                                        |                                |                     |                  |     |                                                                                                                                                                                                                                                                                                                                                                                                                                                                                                                                                                                                                                                                                                                                                                                                                                                                                                                                                                                               |
| Distractability                                                                             | 0.54 (-0.41, 1.48)                                                          |                                                                                                                                                                                                                                                        |                                |                     |                  |     |                                                                                                                                                                                                                                                                                                                                                                                                                                                                                                                                                                                                                                                                                                                                                                                                                                                                                                                                                                                               |

|                                                                                                                              |                                                            |                                                                                                                                                                                  |                                                                                                                                                                                                                                                                                                                                                                                                                                                                                                                                                                                                                                                                                                                                                                                                                                                                                                                                                                                                                                                                                                                                                                                                                                                                                                                                                                                                       |      |                    |  |                               |  |                   |       |      |       |      |                |     |     |     |     |     |     |     |     |     |             |     |     |     |     |             |     |            |          |     |            |      |     |     |    |     |                    |    |                               |     |     |                                                                                                                                                                                                                                                                                                                                                                                                                                                                   |      |       |      |                |  |  |  |  |     |     |     |     |     |             |     |     |     |     |             |     |     |     |      |            |      |  |     |  |                                                                                                                                                                                                                                                                                                               |
|------------------------------------------------------------------------------------------------------------------------------|------------------------------------------------------------|----------------------------------------------------------------------------------------------------------------------------------------------------------------------------------|-------------------------------------------------------------------------------------------------------------------------------------------------------------------------------------------------------------------------------------------------------------------------------------------------------------------------------------------------------------------------------------------------------------------------------------------------------------------------------------------------------------------------------------------------------------------------------------------------------------------------------------------------------------------------------------------------------------------------------------------------------------------------------------------------------------------------------------------------------------------------------------------------------------------------------------------------------------------------------------------------------------------------------------------------------------------------------------------------------------------------------------------------------------------------------------------------------------------------------------------------------------------------------------------------------------------------------------------------------------------------------------------------------|------|--------------------|--|-------------------------------|--|-------------------|-------|------|-------|------|----------------|-----|-----|-----|-----|-----|-----|-----|-----|-----|-------------|-----|-----|-----|-----|-------------|-----|------------|----------|-----|------------|------|-----|-----|----|-----|--------------------|----|-------------------------------|-----|-----|-------------------------------------------------------------------------------------------------------------------------------------------------------------------------------------------------------------------------------------------------------------------------------------------------------------------------------------------------------------------------------------------------------------------------------------------------------------------|------|-------|------|----------------|--|--|--|--|-----|-----|-----|-----|-----|-------------|-----|-----|-----|-----|-------------|-----|-----|-----|------|------------|------|--|-----|--|---------------------------------------------------------------------------------------------------------------------------------------------------------------------------------------------------------------------------------------------------------------------------------------------------------------|
| <p>O'Callaghan, 2003; Australia, Cohort study</p> <p>Selection=4<br/>Comparability=2<br/>Outcome=3</p>                       | <p>1981-84<br/>6320 at birth, 4038 at 5 yrs</p>            | <p>Alcohol exposure by interview at first AN visit and postpartum; head circumference measured by paper tape at birth and 5 yrs</p>                                              | <p><i>Head circumference at birth and at 5 yrs</i></p> <table border="0"> <tr> <td></td> <td colspan="2">% &lt;3<sup>rd</sup></td> <td colspan="2">3-10<sup>th</sup> percentile</td> </tr> <tr> <td></td> <td>birth</td> <td>5yrs</td> <td>birth</td> <td>5yrs</td> </tr> <tr> <td>Binge drinking</td> <td></td> <td></td> <td></td> <td></td> </tr> <tr> <td>Nil</td> <td>3.3</td> <td>2.9</td> <td>5.4</td> <td>6.9</td> </tr> <tr> <td>&lt; half time</td> <td>3.9</td> <td>2.9</td> <td>7.2</td> <td>7.8</td> </tr> <tr> <td>≥ half time</td> <td>2.3</td> <td>3.4</td> <td>6.4</td> <td>5.9</td> </tr> <tr> <td><i>p</i> =</td> <td colspan="2">0.11</td> <td colspan="2">0.9</td> </tr> </table><br><p><i>Weight at birth and at 5 yrs</i></p> <table border="0"> <tr> <td></td> <td colspan="2">% &lt;3<sup>rd</sup></td> <td colspan="2">3-10<sup>th</sup> percentile</td> </tr> <tr> <td></td> <td>birth</td> <td>5yrs</td> <td>birth</td> <td>5yrs</td> </tr> <tr> <td>Binge drinking</td> <td></td> <td></td> <td></td> <td></td> </tr> <tr> <td>Nil</td> <td>2.8</td> <td>2.8</td> <td>6.6</td> <td>7.1</td> </tr> <tr> <td>&lt; half time</td> <td>3.6</td> <td>3.5</td> <td>8.8</td> <td>5.8</td> </tr> <tr> <td>≥ half time</td> <td>3.1</td> <td>1.7</td> <td>7.8</td> <td>10.1</td> </tr> <tr> <td><i>p</i> =</td> <td colspan="2">0.02</td> <td colspan="2">0.3</td> </tr> </table> |      | % <3 <sup>rd</sup> |  | 3-10 <sup>th</sup> percentile |  |                   | birth | 5yrs | birth | 5yrs | Binge drinking |     |     |     |     | Nil | 3.3 | 2.9 | 5.4 | 6.9 | < half time | 3.9 | 2.9 | 7.2 | 7.8 | ≥ half time | 2.3 | 3.4        | 6.4      | 5.9 | <i>p</i> = | 0.11 |     | 0.9 |    |     | % <3 <sup>rd</sup> |    | 3-10 <sup>th</sup> percentile |     |     | birth                                                                                                                                                                                                                                                                                                                                                                                                                                                             | 5yrs | birth | 5yrs | Binge drinking |  |  |  |  | Nil | 2.8 | 2.8 | 6.6 | 7.1 | < half time | 3.6 | 3.5 | 8.8 | 5.8 | ≥ half time | 3.1 | 1.7 | 7.8 | 10.1 | <i>p</i> = | 0.02 |  | 0.3 |  | <p>No adjustment for confounders in this analysis. Participation at birth 74%. Binge defined as 5+ drinks at one time, frequency of binges categorised rather vaguely as never, &lt;half the time or half the time or more in pregnancy. Only asked at 1<sup>st</sup> visit. Follow-up at 5 yrs only 47%.</p> |
|                                                                                                                              | % <3 <sup>rd</sup>                                         |                                                                                                                                                                                  | 3-10 <sup>th</sup> percentile                                                                                                                                                                                                                                                                                                                                                                                                                                                                                                                                                                                                                                                                                                                                                                                                                                                                                                                                                                                                                                                                                                                                                                                                                                                                                                                                                                         |      |                    |  |                               |  |                   |       |      |       |      |                |     |     |     |     |     |     |     |     |     |             |     |     |     |     |             |     |            |          |     |            |      |     |     |    |     |                    |    |                               |     |     |                                                                                                                                                                                                                                                                                                                                                                                                                                                                   |      |       |      |                |  |  |  |  |     |     |     |     |     |             |     |     |     |     |             |     |     |     |      |            |      |  |     |  |                                                                                                                                                                                                                                                                                                               |
|                                                                                                                              | birth                                                      | 5yrs                                                                                                                                                                             | birth                                                                                                                                                                                                                                                                                                                                                                                                                                                                                                                                                                                                                                                                                                                                                                                                                                                                                                                                                                                                                                                                                                                                                                                                                                                                                                                                                                                                 | 5yrs |                    |  |                               |  |                   |       |      |       |      |                |     |     |     |     |     |     |     |     |     |             |     |     |     |     |             |     |            |          |     |            |      |     |     |    |     |                    |    |                               |     |     |                                                                                                                                                                                                                                                                                                                                                                                                                                                                   |      |       |      |                |  |  |  |  |     |     |     |     |     |             |     |     |     |     |             |     |     |     |      |            |      |  |     |  |                                                                                                                                                                                                                                                                                                               |
| Binge drinking                                                                                                               |                                                            |                                                                                                                                                                                  |                                                                                                                                                                                                                                                                                                                                                                                                                                                                                                                                                                                                                                                                                                                                                                                                                                                                                                                                                                                                                                                                                                                                                                                                                                                                                                                                                                                                       |      |                    |  |                               |  |                   |       |      |       |      |                |     |     |     |     |     |     |     |     |     |             |     |     |     |     |             |     |            |          |     |            |      |     |     |    |     |                    |    |                               |     |     |                                                                                                                                                                                                                                                                                                                                                                                                                                                                   |      |       |      |                |  |  |  |  |     |     |     |     |     |             |     |     |     |     |             |     |     |     |      |            |      |  |     |  |                                                                                                                                                                                                                                                                                                               |
| Nil                                                                                                                          | 3.3                                                        | 2.9                                                                                                                                                                              | 5.4                                                                                                                                                                                                                                                                                                                                                                                                                                                                                                                                                                                                                                                                                                                                                                                                                                                                                                                                                                                                                                                                                                                                                                                                                                                                                                                                                                                                   | 6.9  |                    |  |                               |  |                   |       |      |       |      |                |     |     |     |     |     |     |     |     |     |             |     |     |     |     |             |     |            |          |     |            |      |     |     |    |     |                    |    |                               |     |     |                                                                                                                                                                                                                                                                                                                                                                                                                                                                   |      |       |      |                |  |  |  |  |     |     |     |     |     |             |     |     |     |     |             |     |     |     |      |            |      |  |     |  |                                                                                                                                                                                                                                                                                                               |
| < half time                                                                                                                  | 3.9                                                        | 2.9                                                                                                                                                                              | 7.2                                                                                                                                                                                                                                                                                                                                                                                                                                                                                                                                                                                                                                                                                                                                                                                                                                                                                                                                                                                                                                                                                                                                                                                                                                                                                                                                                                                                   | 7.8  |                    |  |                               |  |                   |       |      |       |      |                |     |     |     |     |     |     |     |     |     |             |     |     |     |     |             |     |            |          |     |            |      |     |     |    |     |                    |    |                               |     |     |                                                                                                                                                                                                                                                                                                                                                                                                                                                                   |      |       |      |                |  |  |  |  |     |     |     |     |     |             |     |     |     |     |             |     |     |     |      |            |      |  |     |  |                                                                                                                                                                                                                                                                                                               |
| ≥ half time                                                                                                                  | 2.3                                                        | 3.4                                                                                                                                                                              | 6.4                                                                                                                                                                                                                                                                                                                                                                                                                                                                                                                                                                                                                                                                                                                                                                                                                                                                                                                                                                                                                                                                                                                                                                                                                                                                                                                                                                                                   | 5.9  |                    |  |                               |  |                   |       |      |       |      |                |     |     |     |     |     |     |     |     |     |             |     |     |     |     |             |     |            |          |     |            |      |     |     |    |     |                    |    |                               |     |     |                                                                                                                                                                                                                                                                                                                                                                                                                                                                   |      |       |      |                |  |  |  |  |     |     |     |     |     |             |     |     |     |     |             |     |     |     |      |            |      |  |     |  |                                                                                                                                                                                                                                                                                                               |
| <i>p</i> =                                                                                                                   | 0.11                                                       |                                                                                                                                                                                  | 0.9                                                                                                                                                                                                                                                                                                                                                                                                                                                                                                                                                                                                                                                                                                                                                                                                                                                                                                                                                                                                                                                                                                                                                                                                                                                                                                                                                                                                   |      |                    |  |                               |  |                   |       |      |       |      |                |     |     |     |     |     |     |     |     |     |             |     |     |     |     |             |     |            |          |     |            |      |     |     |    |     |                    |    |                               |     |     |                                                                                                                                                                                                                                                                                                                                                                                                                                                                   |      |       |      |                |  |  |  |  |     |     |     |     |     |             |     |     |     |     |             |     |     |     |      |            |      |  |     |  |                                                                                                                                                                                                                                                                                                               |
|                                                                                                                              | % <3 <sup>rd</sup>                                         |                                                                                                                                                                                  | 3-10 <sup>th</sup> percentile                                                                                                                                                                                                                                                                                                                                                                                                                                                                                                                                                                                                                                                                                                                                                                                                                                                                                                                                                                                                                                                                                                                                                                                                                                                                                                                                                                         |      |                    |  |                               |  |                   |       |      |       |      |                |     |     |     |     |     |     |     |     |     |             |     |     |     |     |             |     |            |          |     |            |      |     |     |    |     |                    |    |                               |     |     |                                                                                                                                                                                                                                                                                                                                                                                                                                                                   |      |       |      |                |  |  |  |  |     |     |     |     |     |             |     |     |     |     |             |     |     |     |      |            |      |  |     |  |                                                                                                                                                                                                                                                                                                               |
|                                                                                                                              | birth                                                      | 5yrs                                                                                                                                                                             | birth                                                                                                                                                                                                                                                                                                                                                                                                                                                                                                                                                                                                                                                                                                                                                                                                                                                                                                                                                                                                                                                                                                                                                                                                                                                                                                                                                                                                 | 5yrs |                    |  |                               |  |                   |       |      |       |      |                |     |     |     |     |     |     |     |     |     |             |     |     |     |     |             |     |            |          |     |            |      |     |     |    |     |                    |    |                               |     |     |                                                                                                                                                                                                                                                                                                                                                                                                                                                                   |      |       |      |                |  |  |  |  |     |     |     |     |     |             |     |     |     |     |             |     |     |     |      |            |      |  |     |  |                                                                                                                                                                                                                                                                                                               |
| Binge drinking                                                                                                               |                                                            |                                                                                                                                                                                  |                                                                                                                                                                                                                                                                                                                                                                                                                                                                                                                                                                                                                                                                                                                                                                                                                                                                                                                                                                                                                                                                                                                                                                                                                                                                                                                                                                                                       |      |                    |  |                               |  |                   |       |      |       |      |                |     |     |     |     |     |     |     |     |     |             |     |     |     |     |             |     |            |          |     |            |      |     |     |    |     |                    |    |                               |     |     |                                                                                                                                                                                                                                                                                                                                                                                                                                                                   |      |       |      |                |  |  |  |  |     |     |     |     |     |             |     |     |     |     |             |     |     |     |      |            |      |  |     |  |                                                                                                                                                                                                                                                                                                               |
| Nil                                                                                                                          | 2.8                                                        | 2.8                                                                                                                                                                              | 6.6                                                                                                                                                                                                                                                                                                                                                                                                                                                                                                                                                                                                                                                                                                                                                                                                                                                                                                                                                                                                                                                                                                                                                                                                                                                                                                                                                                                                   | 7.1  |                    |  |                               |  |                   |       |      |       |      |                |     |     |     |     |     |     |     |     |     |             |     |     |     |     |             |     |            |          |     |            |      |     |     |    |     |                    |    |                               |     |     |                                                                                                                                                                                                                                                                                                                                                                                                                                                                   |      |       |      |                |  |  |  |  |     |     |     |     |     |             |     |     |     |     |             |     |     |     |      |            |      |  |     |  |                                                                                                                                                                                                                                                                                                               |
| < half time                                                                                                                  | 3.6                                                        | 3.5                                                                                                                                                                              | 8.8                                                                                                                                                                                                                                                                                                                                                                                                                                                                                                                                                                                                                                                                                                                                                                                                                                                                                                                                                                                                                                                                                                                                                                                                                                                                                                                                                                                                   | 5.8  |                    |  |                               |  |                   |       |      |       |      |                |     |     |     |     |     |     |     |     |     |             |     |     |     |     |             |     |            |          |     |            |      |     |     |    |     |                    |    |                               |     |     |                                                                                                                                                                                                                                                                                                                                                                                                                                                                   |      |       |      |                |  |  |  |  |     |     |     |     |     |             |     |     |     |     |             |     |     |     |      |            |      |  |     |  |                                                                                                                                                                                                                                                                                                               |
| ≥ half time                                                                                                                  | 3.1                                                        | 1.7                                                                                                                                                                              | 7.8                                                                                                                                                                                                                                                                                                                                                                                                                                                                                                                                                                                                                                                                                                                                                                                                                                                                                                                                                                                                                                                                                                                                                                                                                                                                                                                                                                                                   | 10.1 |                    |  |                               |  |                   |       |      |       |      |                |     |     |     |     |     |     |     |     |     |             |     |     |     |     |             |     |            |          |     |            |      |     |     |    |     |                    |    |                               |     |     |                                                                                                                                                                                                                                                                                                                                                                                                                                                                   |      |       |      |                |  |  |  |  |     |     |     |     |     |             |     |     |     |     |             |     |     |     |      |            |      |  |     |  |                                                                                                                                                                                                                                                                                                               |
| <i>p</i> =                                                                                                                   | 0.02                                                       |                                                                                                                                                                                  | 0.3                                                                                                                                                                                                                                                                                                                                                                                                                                                                                                                                                                                                                                                                                                                                                                                                                                                                                                                                                                                                                                                                                                                                                                                                                                                                                                                                                                                                   |      |                    |  |                               |  |                   |       |      |       |      |                |     |     |     |     |     |     |     |     |     |             |     |     |     |     |             |     |            |          |     |            |      |     |     |    |     |                    |    |                               |     |     |                                                                                                                                                                                                                                                                                                                                                                                                                                                                   |      |       |      |                |  |  |  |  |     |     |     |     |     |             |     |     |     |     |             |     |     |     |      |            |      |  |     |  |                                                                                                                                                                                                                                                                                                               |
| <p>Olsen, 1994; Denmark; Cohort study</p> <p>Part of EuroMac study.</p> <p>Selection=3<br/>Comparability=2<br/>Outcome=2</p> | <p>1988-89<br/>276 children at 18 mths, 217 at 3.5 yrs</p> | <p>Alcohol by questionnaire at 32 wks gestation; Bayley at 18 mths after birth and Griffiths at 42 months after birth by psychologist blind to exposure and previous reports</p> | <p><i>Alcohol intake</i> Bayley at 18 mths</p> <table border="0"> <tr> <td></td> <td colspan="2">PDI</td> <td colspan="2">MDI</td> </tr> <tr> <td><i>No. binges</i></td> <td>unadj</td> <td>adj</td> <td>unadj</td> <td>adj</td> </tr> <tr> <td>0</td> <td>107</td> <td>108</td> <td>106</td> <td>106</td> </tr> <tr> <td>1-4</td> <td>104</td> <td>104</td> <td>104</td> <td>104</td> </tr> <tr> <td>5+</td> <td>103</td> <td>101</td> <td>104</td> <td>104</td> </tr> </table><br><p>Griffiths overall at 3.5 yrs</p> <table border="0"> <tr> <td></td> <td>N</td> <td>Unadjusted</td> <td>adjusted</td> </tr> <tr> <td>0</td> <td>150</td> <td>107</td> <td>107</td> </tr> <tr> <td>1-4</td> <td>56</td> <td>106</td> <td>106</td> </tr> <tr> <td>5+</td> <td>11</td> <td>106</td> <td>106</td> </tr> </table>                                                                                                                                                                                                                                                                                                                                                                                                                                                                                                                                                                                     |      | PDI                |  | MDI                           |  | <i>No. binges</i> | unadj | adj  | unadj | adj  | 0              | 107 | 108 | 106 | 106 | 1-4 | 104 | 104 | 104 | 104 | 5+          | 103 | 101 | 104 | 104 |             | N   | Unadjusted | adjusted | 0   | 150        | 107  | 107 | 1-4 | 56 | 106 | 106                | 5+ | 11                            | 106 | 106 | <p>Included women consuming 5 or more drinks per week, matched 1:1 with lower level drinkers. Matched on expected date of delivery and woman's year of birth. Initial sample representative of population but follow-up at 3.5 yrs 76% and only 66% included in analysis. No data about those lost to follow-up. Adjusted for parents' education, type of residence and smoking. Bingeing defined as 5+ drinks on a single occasion at any time in pregnancy.</p> |      |       |      |                |  |  |  |  |     |     |     |     |     |             |     |     |     |     |             |     |     |     |      |            |      |  |     |  |                                                                                                                                                                                                                                                                                                               |
|                                                                                                                              | PDI                                                        |                                                                                                                                                                                  | MDI                                                                                                                                                                                                                                                                                                                                                                                                                                                                                                                                                                                                                                                                                                                                                                                                                                                                                                                                                                                                                                                                                                                                                                                                                                                                                                                                                                                                   |      |                    |  |                               |  |                   |       |      |       |      |                |     |     |     |     |     |     |     |     |     |             |     |     |     |     |             |     |            |          |     |            |      |     |     |    |     |                    |    |                               |     |     |                                                                                                                                                                                                                                                                                                                                                                                                                                                                   |      |       |      |                |  |  |  |  |     |     |     |     |     |             |     |     |     |     |             |     |     |     |      |            |      |  |     |  |                                                                                                                                                                                                                                                                                                               |
| <i>No. binges</i>                                                                                                            | unadj                                                      | adj                                                                                                                                                                              | unadj                                                                                                                                                                                                                                                                                                                                                                                                                                                                                                                                                                                                                                                                                                                                                                                                                                                                                                                                                                                                                                                                                                                                                                                                                                                                                                                                                                                                 | adj  |                    |  |                               |  |                   |       |      |       |      |                |     |     |     |     |     |     |     |     |     |             |     |     |     |     |             |     |            |          |     |            |      |     |     |    |     |                    |    |                               |     |     |                                                                                                                                                                                                                                                                                                                                                                                                                                                                   |      |       |      |                |  |  |  |  |     |     |     |     |     |             |     |     |     |     |             |     |     |     |      |            |      |  |     |  |                                                                                                                                                                                                                                                                                                               |
| 0                                                                                                                            | 107                                                        | 108                                                                                                                                                                              | 106                                                                                                                                                                                                                                                                                                                                                                                                                                                                                                                                                                                                                                                                                                                                                                                                                                                                                                                                                                                                                                                                                                                                                                                                                                                                                                                                                                                                   | 106  |                    |  |                               |  |                   |       |      |       |      |                |     |     |     |     |     |     |     |     |     |             |     |     |     |     |             |     |            |          |     |            |      |     |     |    |     |                    |    |                               |     |     |                                                                                                                                                                                                                                                                                                                                                                                                                                                                   |      |       |      |                |  |  |  |  |     |     |     |     |     |             |     |     |     |     |             |     |     |     |      |            |      |  |     |  |                                                                                                                                                                                                                                                                                                               |
| 1-4                                                                                                                          | 104                                                        | 104                                                                                                                                                                              | 104                                                                                                                                                                                                                                                                                                                                                                                                                                                                                                                                                                                                                                                                                                                                                                                                                                                                                                                                                                                                                                                                                                                                                                                                                                                                                                                                                                                                   | 104  |                    |  |                               |  |                   |       |      |       |      |                |     |     |     |     |     |     |     |     |     |             |     |     |     |     |             |     |            |          |     |            |      |     |     |    |     |                    |    |                               |     |     |                                                                                                                                                                                                                                                                                                                                                                                                                                                                   |      |       |      |                |  |  |  |  |     |     |     |     |     |             |     |     |     |     |             |     |     |     |      |            |      |  |     |  |                                                                                                                                                                                                                                                                                                               |
| 5+                                                                                                                           | 103                                                        | 101                                                                                                                                                                              | 104                                                                                                                                                                                                                                                                                                                                                                                                                                                                                                                                                                                                                                                                                                                                                                                                                                                                                                                                                                                                                                                                                                                                                                                                                                                                                                                                                                                                   | 104  |                    |  |                               |  |                   |       |      |       |      |                |     |     |     |     |     |     |     |     |     |             |     |     |     |     |             |     |            |          |     |            |      |     |     |    |     |                    |    |                               |     |     |                                                                                                                                                                                                                                                                                                                                                                                                                                                                   |      |       |      |                |  |  |  |  |     |     |     |     |     |             |     |     |     |     |             |     |     |     |      |            |      |  |     |  |                                                                                                                                                                                                                                                                                                               |
|                                                                                                                              | N                                                          | Unadjusted                                                                                                                                                                       | adjusted                                                                                                                                                                                                                                                                                                                                                                                                                                                                                                                                                                                                                                                                                                                                                                                                                                                                                                                                                                                                                                                                                                                                                                                                                                                                                                                                                                                              |      |                    |  |                               |  |                   |       |      |       |      |                |     |     |     |     |     |     |     |     |     |             |     |     |     |     |             |     |            |          |     |            |      |     |     |    |     |                    |    |                               |     |     |                                                                                                                                                                                                                                                                                                                                                                                                                                                                   |      |       |      |                |  |  |  |  |     |     |     |     |     |             |     |     |     |     |             |     |     |     |      |            |      |  |     |  |                                                                                                                                                                                                                                                                                                               |
| 0                                                                                                                            | 150                                                        | 107                                                                                                                                                                              | 107                                                                                                                                                                                                                                                                                                                                                                                                                                                                                                                                                                                                                                                                                                                                                                                                                                                                                                                                                                                                                                                                                                                                                                                                                                                                                                                                                                                                   |      |                    |  |                               |  |                   |       |      |       |      |                |     |     |     |     |     |     |     |     |     |             |     |     |     |     |             |     |            |          |     |            |      |     |     |    |     |                    |    |                               |     |     |                                                                                                                                                                                                                                                                                                                                                                                                                                                                   |      |       |      |                |  |  |  |  |     |     |     |     |     |             |     |     |     |     |             |     |     |     |      |            |      |  |     |  |                                                                                                                                                                                                                                                                                                               |
| 1-4                                                                                                                          | 56                                                         | 106                                                                                                                                                                              | 106                                                                                                                                                                                                                                                                                                                                                                                                                                                                                                                                                                                                                                                                                                                                                                                                                                                                                                                                                                                                                                                                                                                                                                                                                                                                                                                                                                                                   |      |                    |  |                               |  |                   |       |      |       |      |                |     |     |     |     |     |     |     |     |     |             |     |     |     |     |             |     |            |          |     |            |      |     |     |    |     |                    |    |                               |     |     |                                                                                                                                                                                                                                                                                                                                                                                                                                                                   |      |       |      |                |  |  |  |  |     |     |     |     |     |             |     |     |     |     |             |     |     |     |      |            |      |  |     |  |                                                                                                                                                                                                                                                                                                               |
| 5+                                                                                                                           | 11                                                         | 106                                                                                                                                                                              | 106                                                                                                                                                                                                                                                                                                                                                                                                                                                                                                                                                                                                                                                                                                                                                                                                                                                                                                                                                                                                                                                                                                                                                                                                                                                                                                                                                                                                   |      |                    |  |                               |  |                   |       |      |       |      |                |     |     |     |     |     |     |     |     |     |             |     |     |     |     |             |     |            |          |     |            |      |     |     |    |     |                    |    |                               |     |     |                                                                                                                                                                                                                                                                                                                                                                                                                                                                   |      |       |      |                |  |  |  |  |     |     |     |     |     |             |     |     |     |     |             |     |     |     |      |            |      |  |     |  |                                                                                                                                                                                                                                                                                                               |

| <p>Olsen, 1995;<br/>Denmark;<br/>Cohort study</p> <p>Selection=4<br/>Comparability=2<br/>Outcome=2</p>                    | <p>1988-89<br/>323 babies</p>        | <p>Questionnaire and<br/>interview at 1<sup>st</sup> AN<br/>visit; outcomes<br/>measured from photos<br/>at birth and 18 months<br/>after birth</p> | <table border="1"> <thead> <tr> <th></th> <th>Palpebral<br/>fissure</th> <th>Nose<br/>upper lip</th> <th>Root of<br/>nose</th> </tr> </thead> <tbody> <tr> <td colspan="4"><i>No. of Binges in 1<sup>st</sup> trimester</i></td> </tr> <tr> <td colspan="4">Newborns</td> </tr> <tr> <td>0</td> <td>22.7</td> <td>3.0</td> <td>.41</td> </tr> <tr> <td>1-4</td> <td>22.0</td> <td>3.1</td> <td>.42</td> </tr> <tr> <td>5+</td> <td>20.4</td> <td>2.7</td> <td>.42</td> </tr> <tr> <td colspan="4">18 months</td> </tr> <tr> <td>0</td> <td>16.1</td> <td>3.1</td> <td>.55</td> </tr> <tr> <td>1-4</td> <td>15.7</td> <td>3.0</td> <td>.50</td> </tr> <tr> <td>5+</td> <td>14.9</td> <td>3.3</td> <td>.59</td> </tr> </tbody> </table>                                                                                                                                                                                                                                                                                                                 |  | Palpebral<br>fissure     | Nose<br>upper lip | Root of<br>nose           | <i>No. of Binges in 1<sup>st</sup> trimester</i> |            |                                      |            | Newborns   |                                 |            |            | 0                                   | 22.7       | 3.0        | .41                        | 1-4        | 22.0       | 3.1                                                                                                                       | .42 | 5+ | 20.4                    | 2.7 | .42            | 18 months                             |  |               |                              | 0 | 16.1           | 3.1                                                                                                                                                                                                                                                                                                                                                                                                                                                                                                                                                                               | .55 | 1-4 | 15.7 | 3.0 | .50 | 5+ | 14.9 | 3.3 | .59 | <p>Over-sampled women who consumed 5+ drinks per week. Measurement from photos blind to alcohol consumption but correlation between observers inconsistent. Unadjusted for confounders in this analysis.</p> |
|---------------------------------------------------------------------------------------------------------------------------|--------------------------------------|-----------------------------------------------------------------------------------------------------------------------------------------------------|-------------------------------------------------------------------------------------------------------------------------------------------------------------------------------------------------------------------------------------------------------------------------------------------------------------------------------------------------------------------------------------------------------------------------------------------------------------------------------------------------------------------------------------------------------------------------------------------------------------------------------------------------------------------------------------------------------------------------------------------------------------------------------------------------------------------------------------------------------------------------------------------------------------------------------------------------------------------------------------------------------------------------------------------------------|--|--------------------------|-------------------|---------------------------|--------------------------------------------------|------------|--------------------------------------|------------|------------|---------------------------------|------------|------------|-------------------------------------|------------|------------|----------------------------|------------|------------|---------------------------------------------------------------------------------------------------------------------------|-----|----|-------------------------|-----|----------------|---------------------------------------|--|---------------|------------------------------|---|----------------|-----------------------------------------------------------------------------------------------------------------------------------------------------------------------------------------------------------------------------------------------------------------------------------------------------------------------------------------------------------------------------------------------------------------------------------------------------------------------------------------------------------------------------------------------------------------------------------|-----|-----|------|-----|-----|----|------|-----|-----|--------------------------------------------------------------------------------------------------------------------------------------------------------------------------------------------------------------|
|                                                                                                                           | Palpebral<br>fissure                 | Nose<br>upper lip                                                                                                                                   | Root of<br>nose                                                                                                                                                                                                                                                                                                                                                                                                                                                                                                                                                                                                                                                                                                                                                                                                                                                                                                                                                                                                                                       |  |                          |                   |                           |                                                  |            |                                      |            |            |                                 |            |            |                                     |            |            |                            |            |            |                                                                                                                           |     |    |                         |     |                |                                       |  |               |                              |   |                |                                                                                                                                                                                                                                                                                                                                                                                                                                                                                                                                                                                   |     |     |      |     |     |    |      |     |     |                                                                                                                                                                                                              |
| <i>No. of Binges in 1<sup>st</sup> trimester</i>                                                                          |                                      |                                                                                                                                                     |                                                                                                                                                                                                                                                                                                                                                                                                                                                                                                                                                                                                                                                                                                                                                                                                                                                                                                                                                                                                                                                       |  |                          |                   |                           |                                                  |            |                                      |            |            |                                 |            |            |                                     |            |            |                            |            |            |                                                                                                                           |     |    |                         |     |                |                                       |  |               |                              |   |                |                                                                                                                                                                                                                                                                                                                                                                                                                                                                                                                                                                                   |     |     |      |     |     |    |      |     |     |                                                                                                                                                                                                              |
| Newborns                                                                                                                  |                                      |                                                                                                                                                     |                                                                                                                                                                                                                                                                                                                                                                                                                                                                                                                                                                                                                                                                                                                                                                                                                                                                                                                                                                                                                                                       |  |                          |                   |                           |                                                  |            |                                      |            |            |                                 |            |            |                                     |            |            |                            |            |            |                                                                                                                           |     |    |                         |     |                |                                       |  |               |                              |   |                |                                                                                                                                                                                                                                                                                                                                                                                                                                                                                                                                                                                   |     |     |      |     |     |    |      |     |     |                                                                                                                                                                                                              |
| 0                                                                                                                         | 22.7                                 | 3.0                                                                                                                                                 | .41                                                                                                                                                                                                                                                                                                                                                                                                                                                                                                                                                                                                                                                                                                                                                                                                                                                                                                                                                                                                                                                   |  |                          |                   |                           |                                                  |            |                                      |            |            |                                 |            |            |                                     |            |            |                            |            |            |                                                                                                                           |     |    |                         |     |                |                                       |  |               |                              |   |                |                                                                                                                                                                                                                                                                                                                                                                                                                                                                                                                                                                                   |     |     |      |     |     |    |      |     |     |                                                                                                                                                                                                              |
| 1-4                                                                                                                       | 22.0                                 | 3.1                                                                                                                                                 | .42                                                                                                                                                                                                                                                                                                                                                                                                                                                                                                                                                                                                                                                                                                                                                                                                                                                                                                                                                                                                                                                   |  |                          |                   |                           |                                                  |            |                                      |            |            |                                 |            |            |                                     |            |            |                            |            |            |                                                                                                                           |     |    |                         |     |                |                                       |  |               |                              |   |                |                                                                                                                                                                                                                                                                                                                                                                                                                                                                                                                                                                                   |     |     |      |     |     |    |      |     |     |                                                                                                                                                                                                              |
| 5+                                                                                                                        | 20.4                                 | 2.7                                                                                                                                                 | .42                                                                                                                                                                                                                                                                                                                                                                                                                                                                                                                                                                                                                                                                                                                                                                                                                                                                                                                                                                                                                                                   |  |                          |                   |                           |                                                  |            |                                      |            |            |                                 |            |            |                                     |            |            |                            |            |            |                                                                                                                           |     |    |                         |     |                |                                       |  |               |                              |   |                |                                                                                                                                                                                                                                                                                                                                                                                                                                                                                                                                                                                   |     |     |      |     |     |    |      |     |     |                                                                                                                                                                                                              |
| 18 months                                                                                                                 |                                      |                                                                                                                                                     |                                                                                                                                                                                                                                                                                                                                                                                                                                                                                                                                                                                                                                                                                                                                                                                                                                                                                                                                                                                                                                                       |  |                          |                   |                           |                                                  |            |                                      |            |            |                                 |            |            |                                     |            |            |                            |            |            |                                                                                                                           |     |    |                         |     |                |                                       |  |               |                              |   |                |                                                                                                                                                                                                                                                                                                                                                                                                                                                                                                                                                                                   |     |     |      |     |     |    |      |     |     |                                                                                                                                                                                                              |
| 0                                                                                                                         | 16.1                                 | 3.1                                                                                                                                                 | .55                                                                                                                                                                                                                                                                                                                                                                                                                                                                                                                                                                                                                                                                                                                                                                                                                                                                                                                                                                                                                                                   |  |                          |                   |                           |                                                  |            |                                      |            |            |                                 |            |            |                                     |            |            |                            |            |            |                                                                                                                           |     |    |                         |     |                |                                       |  |               |                              |   |                |                                                                                                                                                                                                                                                                                                                                                                                                                                                                                                                                                                                   |     |     |      |     |     |    |      |     |     |                                                                                                                                                                                                              |
| 1-4                                                                                                                       | 15.7                                 | 3.0                                                                                                                                                 | .50                                                                                                                                                                                                                                                                                                                                                                                                                                                                                                                                                                                                                                                                                                                                                                                                                                                                                                                                                                                                                                                   |  |                          |                   |                           |                                                  |            |                                      |            |            |                                 |            |            |                                     |            |            |                            |            |            |                                                                                                                           |     |    |                         |     |                |                                       |  |               |                              |   |                |                                                                                                                                                                                                                                                                                                                                                                                                                                                                                                                                                                                   |     |     |      |     |     |    |      |     |     |                                                                                                                                                                                                              |
| 5+                                                                                                                        | 14.9                                 | 3.3                                                                                                                                                 | .59                                                                                                                                                                                                                                                                                                                                                                                                                                                                                                                                                                                                                                                                                                                                                                                                                                                                                                                                                                                                                                                   |  |                          |                   |                           |                                                  |            |                                      |            |            |                                 |            |            |                                     |            |            |                            |            |            |                                                                                                                           |     |    |                         |     |                |                                       |  |               |                              |   |                |                                                                                                                                                                                                                                                                                                                                                                                                                                                                                                                                                                                   |     |     |      |     |     |    |      |     |     |                                                                                                                                                                                                              |
| <p>Passaro, 1996;<br/>UK, 10,539,<br/>Cohort study</p> <p>Selection=3<br/>Comparability=2<br/>Outcome=3</p>               | <p>1991-92<br/>10,539<br/>babies</p> | <p>Alcohol exposure at<br/>18 weeks gestation;<br/>outcomes from<br/>hospital delivery<br/>records</p>                                              | <table border="1"> <thead> <tr> <th></th> <th>Mean birthweight<br/>(SD)</th> <th>Mean GA<br/>(SD)</th> </tr> </thead> <tbody> <tr> <td>Nonbingeing<br/>abstainers</td> <td>3397 (512)</td> <td>40.1 (2.1)</td> </tr> <tr> <td>Nonbingeing occ-<br/>asional drinkers</td> <td>3419 (488)</td> <td>40.1 (1.9)</td> </tr> <tr> <td>Bingeing occasional<br/>drinkers</td> <td>3408 (498)</td> <td>40.1 (2.0)</td> </tr> <tr> <td>Nonbingeing light<br/>daily drinkers</td> <td>3401 (441)</td> <td>39.8 (1.9)</td> </tr> <tr> <td>Heavy drinkers/<br/>bingers</td> <td>3222 (538)</td> <td>40.1 (2.3)</td> </tr> <tr> <td colspan="3"><i>Adjusted mean differences in birthweight (95% CI) compared to prepregnancy drinkers who abstained during pregnancy</i></td> </tr> <tr> <td>Non-bingeing abstainers</td> <td></td> <td>-36g (-71, -1)</td> </tr> <tr> <td>Non-bingeing occ-<br/>asional drinkers</td> <td></td> <td>-3g (-24, 16)</td> </tr> <tr> <td>Bingeing occasional drinkers</td> <td></td> <td>-7g (-33, 177)</td> </tr> </tbody> </table> |  | Mean birthweight<br>(SD) | Mean GA<br>(SD)   | Nonbingeing<br>abstainers | 3397 (512)                                       | 40.1 (2.1) | Nonbingeing occ-<br>asional drinkers | 3419 (488) | 40.1 (1.9) | Bingeing occasional<br>drinkers | 3408 (498) | 40.1 (2.0) | Nonbingeing light<br>daily drinkers | 3401 (441) | 39.8 (1.9) | Heavy drinkers/<br>bingers | 3222 (538) | 40.1 (2.3) | <i>Adjusted mean differences in birthweight (95% CI) compared to prepregnancy drinkers who abstained during pregnancy</i> |     |    | Non-bingeing abstainers |     | -36g (-71, -1) | Non-bingeing occ-<br>asional drinkers |  | -3g (-24, 16) | Bingeing occasional drinkers |   | -7g (-33, 177) | <p>Large population based study with about 90% response rate. Binge defined as 40-45g alcohol on a single occasion in the first 18 weeks of pregnancy. Mean differences in birthweight adjusted for GA, infant sex, parity, maternal smoking and BMI showed no significant differences except for lower birthweight in non-bingeing abstainers and in heavy drinkers/bingers. Type of alcoholic drink made no difference to results. Limiting analysis to exclude users of marijuana, crack and cocaine, and excluding women with a history of alcoholism made no difference.</p> |     |     |      |     |     |    |      |     |     |                                                                                                                                                                                                              |
|                                                                                                                           | Mean birthweight<br>(SD)             | Mean GA<br>(SD)                                                                                                                                     |                                                                                                                                                                                                                                                                                                                                                                                                                                                                                                                                                                                                                                                                                                                                                                                                                                                                                                                                                                                                                                                       |  |                          |                   |                           |                                                  |            |                                      |            |            |                                 |            |            |                                     |            |            |                            |            |            |                                                                                                                           |     |    |                         |     |                |                                       |  |               |                              |   |                |                                                                                                                                                                                                                                                                                                                                                                                                                                                                                                                                                                                   |     |     |      |     |     |    |      |     |     |                                                                                                                                                                                                              |
| Nonbingeing<br>abstainers                                                                                                 | 3397 (512)                           | 40.1 (2.1)                                                                                                                                          |                                                                                                                                                                                                                                                                                                                                                                                                                                                                                                                                                                                                                                                                                                                                                                                                                                                                                                                                                                                                                                                       |  |                          |                   |                           |                                                  |            |                                      |            |            |                                 |            |            |                                     |            |            |                            |            |            |                                                                                                                           |     |    |                         |     |                |                                       |  |               |                              |   |                |                                                                                                                                                                                                                                                                                                                                                                                                                                                                                                                                                                                   |     |     |      |     |     |    |      |     |     |                                                                                                                                                                                                              |
| Nonbingeing occ-<br>asional drinkers                                                                                      | 3419 (488)                           | 40.1 (1.9)                                                                                                                                          |                                                                                                                                                                                                                                                                                                                                                                                                                                                                                                                                                                                                                                                                                                                                                                                                                                                                                                                                                                                                                                                       |  |                          |                   |                           |                                                  |            |                                      |            |            |                                 |            |            |                                     |            |            |                            |            |            |                                                                                                                           |     |    |                         |     |                |                                       |  |               |                              |   |                |                                                                                                                                                                                                                                                                                                                                                                                                                                                                                                                                                                                   |     |     |      |     |     |    |      |     |     |                                                                                                                                                                                                              |
| Bingeing occasional<br>drinkers                                                                                           | 3408 (498)                           | 40.1 (2.0)                                                                                                                                          |                                                                                                                                                                                                                                                                                                                                                                                                                                                                                                                                                                                                                                                                                                                                                                                                                                                                                                                                                                                                                                                       |  |                          |                   |                           |                                                  |            |                                      |            |            |                                 |            |            |                                     |            |            |                            |            |            |                                                                                                                           |     |    |                         |     |                |                                       |  |               |                              |   |                |                                                                                                                                                                                                                                                                                                                                                                                                                                                                                                                                                                                   |     |     |      |     |     |    |      |     |     |                                                                                                                                                                                                              |
| Nonbingeing light<br>daily drinkers                                                                                       | 3401 (441)                           | 39.8 (1.9)                                                                                                                                          |                                                                                                                                                                                                                                                                                                                                                                                                                                                                                                                                                                                                                                                                                                                                                                                                                                                                                                                                                                                                                                                       |  |                          |                   |                           |                                                  |            |                                      |            |            |                                 |            |            |                                     |            |            |                            |            |            |                                                                                                                           |     |    |                         |     |                |                                       |  |               |                              |   |                |                                                                                                                                                                                                                                                                                                                                                                                                                                                                                                                                                                                   |     |     |      |     |     |    |      |     |     |                                                                                                                                                                                                              |
| Heavy drinkers/<br>bingers                                                                                                | 3222 (538)                           | 40.1 (2.3)                                                                                                                                          |                                                                                                                                                                                                                                                                                                                                                                                                                                                                                                                                                                                                                                                                                                                                                                                                                                                                                                                                                                                                                                                       |  |                          |                   |                           |                                                  |            |                                      |            |            |                                 |            |            |                                     |            |            |                            |            |            |                                                                                                                           |     |    |                         |     |                |                                       |  |               |                              |   |                |                                                                                                                                                                                                                                                                                                                                                                                                                                                                                                                                                                                   |     |     |      |     |     |    |      |     |     |                                                                                                                                                                                                              |
| <i>Adjusted mean differences in birthweight (95% CI) compared to prepregnancy drinkers who abstained during pregnancy</i> |                                      |                                                                                                                                                     |                                                                                                                                                                                                                                                                                                                                                                                                                                                                                                                                                                                                                                                                                                                                                                                                                                                                                                                                                                                                                                                       |  |                          |                   |                           |                                                  |            |                                      |            |            |                                 |            |            |                                     |            |            |                            |            |            |                                                                                                                           |     |    |                         |     |                |                                       |  |               |                              |   |                |                                                                                                                                                                                                                                                                                                                                                                                                                                                                                                                                                                                   |     |     |      |     |     |    |      |     |     |                                                                                                                                                                                                              |
| Non-bingeing abstainers                                                                                                   |                                      | -36g (-71, -1)                                                                                                                                      |                                                                                                                                                                                                                                                                                                                                                                                                                                                                                                                                                                                                                                                                                                                                                                                                                                                                                                                                                                                                                                                       |  |                          |                   |                           |                                                  |            |                                      |            |            |                                 |            |            |                                     |            |            |                            |            |            |                                                                                                                           |     |    |                         |     |                |                                       |  |               |                              |   |                |                                                                                                                                                                                                                                                                                                                                                                                                                                                                                                                                                                                   |     |     |      |     |     |    |      |     |     |                                                                                                                                                                                                              |
| Non-bingeing occ-<br>asional drinkers                                                                                     |                                      | -3g (-24, 16)                                                                                                                                       |                                                                                                                                                                                                                                                                                                                                                                                                                                                                                                                                                                                                                                                                                                                                                                                                                                                                                                                                                                                                                                                       |  |                          |                   |                           |                                                  |            |                                      |            |            |                                 |            |            |                                     |            |            |                            |            |            |                                                                                                                           |     |    |                         |     |                |                                       |  |               |                              |   |                |                                                                                                                                                                                                                                                                                                                                                                                                                                                                                                                                                                                   |     |     |      |     |     |    |      |     |     |                                                                                                                                                                                                              |
| Bingeing occasional drinkers                                                                                              |                                      | -7g (-33, 177)                                                                                                                                      |                                                                                                                                                                                                                                                                                                                                                                                                                                                                                                                                                                                                                                                                                                                                                                                                                                                                                                                                                                                                                                                       |  |                          |                   |                           |                                                  |            |                                      |            |            |                                 |            |            |                                     |            |            |                            |            |            |                                                                                                                           |     |    |                         |     |                |                                       |  |               |                              |   |                |                                                                                                                                                                                                                                                                                                                                                                                                                                                                                                                                                                                   |     |     |      |     |     |    |      |     |     |                                                                                                                                                                                                              |

|                                                                                                        |                                                        |                                                                                                                                                     |                                                                                                                                                                                                                                                                                                                                                                                                                                 |                                                                                                                                                                                                                                                                                                                                                                                                                                                                                |
|--------------------------------------------------------------------------------------------------------|--------------------------------------------------------|-----------------------------------------------------------------------------------------------------------------------------------------------------|---------------------------------------------------------------------------------------------------------------------------------------------------------------------------------------------------------------------------------------------------------------------------------------------------------------------------------------------------------------------------------------------------------------------------------|--------------------------------------------------------------------------------------------------------------------------------------------------------------------------------------------------------------------------------------------------------------------------------------------------------------------------------------------------------------------------------------------------------------------------------------------------------------------------------|
|                                                                                                        |                                                        |                                                                                                                                                     | Non-bingeing light daily drinkers 52g (-73, 177)<br>Heavy drinkers/bingers -152g (-228, -76)                                                                                                                                                                                                                                                                                                                                    |                                                                                                                                                                                                                                                                                                                                                                                                                                                                                |
| Plant, 1988; UK;<br>Cohort study<br><br>Selection=4<br>Comparability=2<br>Outcome=2                    | 1980-83<br>1008<br>women                               | Alcohol by interview in 3 <sup>rd</sup> month of pregnancy; outcomes from case notes                                                                | Mean no. abnormalities noted at birth<br>Bingers 2.0<br>Abstainers 1.2 $p<0.05$<br>Bingers and smoked 10+ cigs daily 2.4<br>Non-smoking abstainers 1.0 $p<0.001$                                                                                                                                                                                                                                                                | Bingeing defined as drinking 10+ units on a single occasion in first trimester of pregnancy. Not all analyses presented. Participation rate not stated. Not adjusted for other confounders in this analysis.                                                                                                                                                                                                                                                                   |
| Sampson, 1994; USA;<br>Cohort study (Seattle study)<br><br>Selection=4<br>Comparability=2<br>Outcome=3 | 1974-75<br>1439<br>women,<br>follow-up of 500 children | Alcohol exposure by interview at 5 months gestation; birth outcomes from medical records, 8 and 18 mths, 4, 7 and 14 yrs after birth by examination | Unadjusted correlations<br><i>Bingeing prior to pregnancy recognition</i><br>Birth 8mo 18mo 4y 7y 14y<br>Weight -.15 .01 .05 -.03 .02 -.01<br>Length -.01 .05 .08 .03 .04 .04<br>Head circumference -.07 .01 -.01 -.02 -.01 -.03<br><br><i>Bingeing during pregnancy</i><br>Birth 8mo 18mo 4y 7y 14y<br>Weight -.11 .01 .05 .02 .04 .06<br>Length -.06 .02 .04 .02 -.01 .05<br>Head circumference -.08 -.02 -.02 -.02 -.04 -.04 | Mainly white, married, middle class women. 500 women who were selected for follow-up were selected for high level alcohol consumption. Binge defined as 5+ drinks on a single occasion in first 5 months of pregnancy. Analyses unadjusted for confounders (except at 8 mths after birth where heavier drinkers were inadvertently over-sampled). Number lost to follow-up not stated. Strongest correlations were at birth and 8 mths, possible 'catch-up' growth thereafter. |

|                                                                                                                                 |                                                                                                |                                                                                                                                                                                                                                                          |                                                                                                                                                                                                                                                                                                                                                                                                                                                                                                                                                                                                                                                                                                                                                                                                                                                                                                                                                                                                                                                                                                                                                                                                                                                                                                                                                                                                                                                                                                                                                                                                                                                                                                                                                                                                                                                                                           |               |   |                                    |  |  |         |      |      |        |  |          |      |      |        |  |            |      |      |        |  |                          |  |         |            |   |                        |  |    |   |      |              |  |    |   |      |             |  |    |   |      |                                   |  |    |   |      |                                     |  |    |    |      |                                         |  |    |    |      |  |  |    |    |      |                 |  |  |  |  |               |  |       |       |  |           |  |       |       |  |                |  |       |       |  |                            |  |  |  |  |  |  |             |            |  |               |       |       |       |       |              |       |       |       |       |                                                                                                                                                                                                                                                                                                                                                                                                                                                                                                                                                                                                                                                             |
|---------------------------------------------------------------------------------------------------------------------------------|------------------------------------------------------------------------------------------------|----------------------------------------------------------------------------------------------------------------------------------------------------------------------------------------------------------------------------------------------------------|-------------------------------------------------------------------------------------------------------------------------------------------------------------------------------------------------------------------------------------------------------------------------------------------------------------------------------------------------------------------------------------------------------------------------------------------------------------------------------------------------------------------------------------------------------------------------------------------------------------------------------------------------------------------------------------------------------------------------------------------------------------------------------------------------------------------------------------------------------------------------------------------------------------------------------------------------------------------------------------------------------------------------------------------------------------------------------------------------------------------------------------------------------------------------------------------------------------------------------------------------------------------------------------------------------------------------------------------------------------------------------------------------------------------------------------------------------------------------------------------------------------------------------------------------------------------------------------------------------------------------------------------------------------------------------------------------------------------------------------------------------------------------------------------------------------------------------------------------------------------------------------------|---------------|---|------------------------------------|--|--|---------|------|------|--------|--|----------|------|------|--------|--|------------|------|------|--------|--|--------------------------|--|---------|------------|---|------------------------|--|----|---|------|--------------|--|----|---|------|-------------|--|----|---|------|-----------------------------------|--|----|---|------|-------------------------------------|--|----|----|------|-----------------------------------------|--|----|----|------|--|--|----|----|------|-----------------|--|--|--|--|---------------|--|-------|-------|--|-----------|--|-------|-------|--|----------------|--|-------|-------|--|----------------------------|--|--|--|--|--|--|-------------|------------|--|---------------|-------|-------|-------|-------|--------------|-------|-------|-------|-------|-------------------------------------------------------------------------------------------------------------------------------------------------------------------------------------------------------------------------------------------------------------------------------------------------------------------------------------------------------------------------------------------------------------------------------------------------------------------------------------------------------------------------------------------------------------------------------------------------------------------------------------------------------------|
| <p>Streissguth, 1989, 1990 and 1994; USA; Cohort study (Seattle study)</p> <p>Selection=4<br/>Comparability=2<br/>Outcome=3</p> | <p>1974-75<br/>486<br/>children at<br/>age 7 yrs</p> <p>359<br/>children at<br/>age 14 yrs</p> | <p>Alcohol exposure retrospectively by interview at 5 mths gestation in their own homes; Weschler Intelligence Scale for Children (WISC), Wide Range Achievement Test (WRAT), Connors carried out between 6.5-7.5 yrs by examiners blind to exposure</p> | <table border="0"> <tr> <td>WRAT at age 7</td> <td>R</td> <td colspan="3">Adjusted achievement decrement (p)</td> </tr> <tr> <td>Reading</td> <td>0.55</td> <td>-3.3</td> <td colspan="2">(.038)</td> </tr> <tr> <td>Spelling</td> <td>0.58</td> <td>-1.8</td> <td colspan="2">(.227)</td> </tr> <tr> <td>Arithmetic</td> <td>0.62</td> <td>-3.3</td> <td colspan="2">(.000)</td> </tr> <tr> <td><i>Learning problems</i></td> <td></td> <td>Binge %</td> <td>No-binge %</td> <td>p</td> </tr> <tr> <td>Connors learning probs</td> <td></td> <td>17</td> <td>7</td> <td>.000</td> </tr> <tr> <td>hyperkinesis</td> <td></td> <td>15</td> <td>9</td> <td>.091</td> </tr> <tr> <td>impulsivity</td> <td></td> <td>13</td> <td>8</td> <td>.104</td> </tr> <tr> <td>Parental assessment below average</td> <td></td> <td>13</td> <td>4</td> <td>.000</td> </tr> <tr> <td>Myklebust (teacher) MPRS &lt;65 cutoff</td> <td></td> <td>17</td> <td>10</td> <td>.037</td> </tr> <tr> <td>School special class &lt;age approp. grade</td> <td></td> <td>24</td> <td>15</td> <td>.011</td> </tr> <tr> <td></td> <td></td> <td>19</td> <td>14</td> <td>.147</td> </tr> <tr> <td>Mean WISC score</td> <td></td> <td></td> <td></td> <td></td> </tr> <tr> <td>full scale IQ</td> <td></td> <td>104.8</td> <td>108.7</td> <td></td> </tr> <tr> <td>verbal IQ</td> <td></td> <td>103.5</td> <td>107.2</td> <td></td> </tr> <tr> <td>performance IQ</td> <td></td> <td>105.3</td> <td>108.8</td> <td></td> </tr> <tr> <td><i>Age 14 correlations</i></td> <td></td> <td></td> <td></td> <td></td> </tr> <tr> <td></td> <td></td> <td>Word attack</td> <td>Arithmetic</td> <td></td> </tr> <tr> <td>Pre-pregnancy</td> <td>-0.15</td> <td>p&lt;.01</td> <td>-0.15</td> <td>p&lt;.05</td> </tr> <tr> <td>In pregnancy</td> <td>-0.12</td> <td>p&lt;.05</td> <td>-0.15</td> <td>p&lt;.05</td> </tr> </table> | WRAT at age 7 | R | Adjusted achievement decrement (p) |  |  | Reading | 0.55 | -3.3 | (.038) |  | Spelling | 0.58 | -1.8 | (.227) |  | Arithmetic | 0.62 | -3.3 | (.000) |  | <i>Learning problems</i> |  | Binge % | No-binge % | p | Connors learning probs |  | 17 | 7 | .000 | hyperkinesis |  | 15 | 9 | .091 | impulsivity |  | 13 | 8 | .104 | Parental assessment below average |  | 13 | 4 | .000 | Myklebust (teacher) MPRS <65 cutoff |  | 17 | 10 | .037 | School special class <age approp. grade |  | 24 | 15 | .011 |  |  | 19 | 14 | .147 | Mean WISC score |  |  |  |  | full scale IQ |  | 104.8 | 108.7 |  | verbal IQ |  | 103.5 | 107.2 |  | performance IQ |  | 105.3 | 108.8 |  | <i>Age 14 correlations</i> |  |  |  |  |  |  | Word attack | Arithmetic |  | Pre-pregnancy | -0.15 | p<.01 | -0.15 | p<.05 | In pregnancy | -0.12 | p<.05 | -0.15 | p<.05 | <p>Predominantly white, middle class, married. Oversampled for heavier drinkers and smokers. Excluded multiple births. Participation rate 85%. Pre-pregnancy binges defined as 5+ drinks on any one occasion in first 5 months of pregnancy. Follow-up rate not stated. Inter-rater unreliability on WISC and Word Attack scores. WRAT adjusted for maternal and paternal education, no. children in household, household stress, prenatal nutrition, smoking, aspirin and caffeine, sex, race and grade of child, exam conditions. Multiple regression (R) and age14 years correlations indicates test scores against a binary binge drinking measure.</p> |
| WRAT at age 7                                                                                                                   | R                                                                                              | Adjusted achievement decrement (p)                                                                                                                                                                                                                       |                                                                                                                                                                                                                                                                                                                                                                                                                                                                                                                                                                                                                                                                                                                                                                                                                                                                                                                                                                                                                                                                                                                                                                                                                                                                                                                                                                                                                                                                                                                                                                                                                                                                                                                                                                                                                                                                                           |               |   |                                    |  |  |         |      |      |        |  |          |      |      |        |  |            |      |      |        |  |                          |  |         |            |   |                        |  |    |   |      |              |  |    |   |      |             |  |    |   |      |                                   |  |    |   |      |                                     |  |    |    |      |                                         |  |    |    |      |  |  |    |    |      |                 |  |  |  |  |               |  |       |       |  |           |  |       |       |  |                |  |       |       |  |                            |  |  |  |  |  |  |             |            |  |               |       |       |       |       |              |       |       |       |       |                                                                                                                                                                                                                                                                                                                                                                                                                                                                                                                                                                                                                                                             |
| Reading                                                                                                                         | 0.55                                                                                           | -3.3                                                                                                                                                                                                                                                     | (.038)                                                                                                                                                                                                                                                                                                                                                                                                                                                                                                                                                                                                                                                                                                                                                                                                                                                                                                                                                                                                                                                                                                                                                                                                                                                                                                                                                                                                                                                                                                                                                                                                                                                                                                                                                                                                                                                                                    |               |   |                                    |  |  |         |      |      |        |  |          |      |      |        |  |            |      |      |        |  |                          |  |         |            |   |                        |  |    |   |      |              |  |    |   |      |             |  |    |   |      |                                   |  |    |   |      |                                     |  |    |    |      |                                         |  |    |    |      |  |  |    |    |      |                 |  |  |  |  |               |  |       |       |  |           |  |       |       |  |                |  |       |       |  |                            |  |  |  |  |  |  |             |            |  |               |       |       |       |       |              |       |       |       |       |                                                                                                                                                                                                                                                                                                                                                                                                                                                                                                                                                                                                                                                             |
| Spelling                                                                                                                        | 0.58                                                                                           | -1.8                                                                                                                                                                                                                                                     | (.227)                                                                                                                                                                                                                                                                                                                                                                                                                                                                                                                                                                                                                                                                                                                                                                                                                                                                                                                                                                                                                                                                                                                                                                                                                                                                                                                                                                                                                                                                                                                                                                                                                                                                                                                                                                                                                                                                                    |               |   |                                    |  |  |         |      |      |        |  |          |      |      |        |  |            |      |      |        |  |                          |  |         |            |   |                        |  |    |   |      |              |  |    |   |      |             |  |    |   |      |                                   |  |    |   |      |                                     |  |    |    |      |                                         |  |    |    |      |  |  |    |    |      |                 |  |  |  |  |               |  |       |       |  |           |  |       |       |  |                |  |       |       |  |                            |  |  |  |  |  |  |             |            |  |               |       |       |       |       |              |       |       |       |       |                                                                                                                                                                                                                                                                                                                                                                                                                                                                                                                                                                                                                                                             |
| Arithmetic                                                                                                                      | 0.62                                                                                           | -3.3                                                                                                                                                                                                                                                     | (.000)                                                                                                                                                                                                                                                                                                                                                                                                                                                                                                                                                                                                                                                                                                                                                                                                                                                                                                                                                                                                                                                                                                                                                                                                                                                                                                                                                                                                                                                                                                                                                                                                                                                                                                                                                                                                                                                                                    |               |   |                                    |  |  |         |      |      |        |  |          |      |      |        |  |            |      |      |        |  |                          |  |         |            |   |                        |  |    |   |      |              |  |    |   |      |             |  |    |   |      |                                   |  |    |   |      |                                     |  |    |    |      |                                         |  |    |    |      |  |  |    |    |      |                 |  |  |  |  |               |  |       |       |  |           |  |       |       |  |                |  |       |       |  |                            |  |  |  |  |  |  |             |            |  |               |       |       |       |       |              |       |       |       |       |                                                                                                                                                                                                                                                                                                                                                                                                                                                                                                                                                                                                                                                             |
| <i>Learning problems</i>                                                                                                        |                                                                                                | Binge %                                                                                                                                                                                                                                                  | No-binge %                                                                                                                                                                                                                                                                                                                                                                                                                                                                                                                                                                                                                                                                                                                                                                                                                                                                                                                                                                                                                                                                                                                                                                                                                                                                                                                                                                                                                                                                                                                                                                                                                                                                                                                                                                                                                                                                                | p             |   |                                    |  |  |         |      |      |        |  |          |      |      |        |  |            |      |      |        |  |                          |  |         |            |   |                        |  |    |   |      |              |  |    |   |      |             |  |    |   |      |                                   |  |    |   |      |                                     |  |    |    |      |                                         |  |    |    |      |  |  |    |    |      |                 |  |  |  |  |               |  |       |       |  |           |  |       |       |  |                |  |       |       |  |                            |  |  |  |  |  |  |             |            |  |               |       |       |       |       |              |       |       |       |       |                                                                                                                                                                                                                                                                                                                                                                                                                                                                                                                                                                                                                                                             |
| Connors learning probs                                                                                                          |                                                                                                | 17                                                                                                                                                                                                                                                       | 7                                                                                                                                                                                                                                                                                                                                                                                                                                                                                                                                                                                                                                                                                                                                                                                                                                                                                                                                                                                                                                                                                                                                                                                                                                                                                                                                                                                                                                                                                                                                                                                                                                                                                                                                                                                                                                                                                         | .000          |   |                                    |  |  |         |      |      |        |  |          |      |      |        |  |            |      |      |        |  |                          |  |         |            |   |                        |  |    |   |      |              |  |    |   |      |             |  |    |   |      |                                   |  |    |   |      |                                     |  |    |    |      |                                         |  |    |    |      |  |  |    |    |      |                 |  |  |  |  |               |  |       |       |  |           |  |       |       |  |                |  |       |       |  |                            |  |  |  |  |  |  |             |            |  |               |       |       |       |       |              |       |       |       |       |                                                                                                                                                                                                                                                                                                                                                                                                                                                                                                                                                                                                                                                             |
| hyperkinesis                                                                                                                    |                                                                                                | 15                                                                                                                                                                                                                                                       | 9                                                                                                                                                                                                                                                                                                                                                                                                                                                                                                                                                                                                                                                                                                                                                                                                                                                                                                                                                                                                                                                                                                                                                                                                                                                                                                                                                                                                                                                                                                                                                                                                                                                                                                                                                                                                                                                                                         | .091          |   |                                    |  |  |         |      |      |        |  |          |      |      |        |  |            |      |      |        |  |                          |  |         |            |   |                        |  |    |   |      |              |  |    |   |      |             |  |    |   |      |                                   |  |    |   |      |                                     |  |    |    |      |                                         |  |    |    |      |  |  |    |    |      |                 |  |  |  |  |               |  |       |       |  |           |  |       |       |  |                |  |       |       |  |                            |  |  |  |  |  |  |             |            |  |               |       |       |       |       |              |       |       |       |       |                                                                                                                                                                                                                                                                                                                                                                                                                                                                                                                                                                                                                                                             |
| impulsivity                                                                                                                     |                                                                                                | 13                                                                                                                                                                                                                                                       | 8                                                                                                                                                                                                                                                                                                                                                                                                                                                                                                                                                                                                                                                                                                                                                                                                                                                                                                                                                                                                                                                                                                                                                                                                                                                                                                                                                                                                                                                                                                                                                                                                                                                                                                                                                                                                                                                                                         | .104          |   |                                    |  |  |         |      |      |        |  |          |      |      |        |  |            |      |      |        |  |                          |  |         |            |   |                        |  |    |   |      |              |  |    |   |      |             |  |    |   |      |                                   |  |    |   |      |                                     |  |    |    |      |                                         |  |    |    |      |  |  |    |    |      |                 |  |  |  |  |               |  |       |       |  |           |  |       |       |  |                |  |       |       |  |                            |  |  |  |  |  |  |             |            |  |               |       |       |       |       |              |       |       |       |       |                                                                                                                                                                                                                                                                                                                                                                                                                                                                                                                                                                                                                                                             |
| Parental assessment below average                                                                                               |                                                                                                | 13                                                                                                                                                                                                                                                       | 4                                                                                                                                                                                                                                                                                                                                                                                                                                                                                                                                                                                                                                                                                                                                                                                                                                                                                                                                                                                                                                                                                                                                                                                                                                                                                                                                                                                                                                                                                                                                                                                                                                                                                                                                                                                                                                                                                         | .000          |   |                                    |  |  |         |      |      |        |  |          |      |      |        |  |            |      |      |        |  |                          |  |         |            |   |                        |  |    |   |      |              |  |    |   |      |             |  |    |   |      |                                   |  |    |   |      |                                     |  |    |    |      |                                         |  |    |    |      |  |  |    |    |      |                 |  |  |  |  |               |  |       |       |  |           |  |       |       |  |                |  |       |       |  |                            |  |  |  |  |  |  |             |            |  |               |       |       |       |       |              |       |       |       |       |                                                                                                                                                                                                                                                                                                                                                                                                                                                                                                                                                                                                                                                             |
| Myklebust (teacher) MPRS <65 cutoff                                                                                             |                                                                                                | 17                                                                                                                                                                                                                                                       | 10                                                                                                                                                                                                                                                                                                                                                                                                                                                                                                                                                                                                                                                                                                                                                                                                                                                                                                                                                                                                                                                                                                                                                                                                                                                                                                                                                                                                                                                                                                                                                                                                                                                                                                                                                                                                                                                                                        | .037          |   |                                    |  |  |         |      |      |        |  |          |      |      |        |  |            |      |      |        |  |                          |  |         |            |   |                        |  |    |   |      |              |  |    |   |      |             |  |    |   |      |                                   |  |    |   |      |                                     |  |    |    |      |                                         |  |    |    |      |  |  |    |    |      |                 |  |  |  |  |               |  |       |       |  |           |  |       |       |  |                |  |       |       |  |                            |  |  |  |  |  |  |             |            |  |               |       |       |       |       |              |       |       |       |       |                                                                                                                                                                                                                                                                                                                                                                                                                                                                                                                                                                                                                                                             |
| School special class <age approp. grade                                                                                         |                                                                                                | 24                                                                                                                                                                                                                                                       | 15                                                                                                                                                                                                                                                                                                                                                                                                                                                                                                                                                                                                                                                                                                                                                                                                                                                                                                                                                                                                                                                                                                                                                                                                                                                                                                                                                                                                                                                                                                                                                                                                                                                                                                                                                                                                                                                                                        | .011          |   |                                    |  |  |         |      |      |        |  |          |      |      |        |  |            |      |      |        |  |                          |  |         |            |   |                        |  |    |   |      |              |  |    |   |      |             |  |    |   |      |                                   |  |    |   |      |                                     |  |    |    |      |                                         |  |    |    |      |  |  |    |    |      |                 |  |  |  |  |               |  |       |       |  |           |  |       |       |  |                |  |       |       |  |                            |  |  |  |  |  |  |             |            |  |               |       |       |       |       |              |       |       |       |       |                                                                                                                                                                                                                                                                                                                                                                                                                                                                                                                                                                                                                                                             |
|                                                                                                                                 |                                                                                                | 19                                                                                                                                                                                                                                                       | 14                                                                                                                                                                                                                                                                                                                                                                                                                                                                                                                                                                                                                                                                                                                                                                                                                                                                                                                                                                                                                                                                                                                                                                                                                                                                                                                                                                                                                                                                                                                                                                                                                                                                                                                                                                                                                                                                                        | .147          |   |                                    |  |  |         |      |      |        |  |          |      |      |        |  |            |      |      |        |  |                          |  |         |            |   |                        |  |    |   |      |              |  |    |   |      |             |  |    |   |      |                                   |  |    |   |      |                                     |  |    |    |      |                                         |  |    |    |      |  |  |    |    |      |                 |  |  |  |  |               |  |       |       |  |           |  |       |       |  |                |  |       |       |  |                            |  |  |  |  |  |  |             |            |  |               |       |       |       |       |              |       |       |       |       |                                                                                                                                                                                                                                                                                                                                                                                                                                                                                                                                                                                                                                                             |
| Mean WISC score                                                                                                                 |                                                                                                |                                                                                                                                                                                                                                                          |                                                                                                                                                                                                                                                                                                                                                                                                                                                                                                                                                                                                                                                                                                                                                                                                                                                                                                                                                                                                                                                                                                                                                                                                                                                                                                                                                                                                                                                                                                                                                                                                                                                                                                                                                                                                                                                                                           |               |   |                                    |  |  |         |      |      |        |  |          |      |      |        |  |            |      |      |        |  |                          |  |         |            |   |                        |  |    |   |      |              |  |    |   |      |             |  |    |   |      |                                   |  |    |   |      |                                     |  |    |    |      |                                         |  |    |    |      |  |  |    |    |      |                 |  |  |  |  |               |  |       |       |  |           |  |       |       |  |                |  |       |       |  |                            |  |  |  |  |  |  |             |            |  |               |       |       |       |       |              |       |       |       |       |                                                                                                                                                                                                                                                                                                                                                                                                                                                                                                                                                                                                                                                             |
| full scale IQ                                                                                                                   |                                                                                                | 104.8                                                                                                                                                                                                                                                    | 108.7                                                                                                                                                                                                                                                                                                                                                                                                                                                                                                                                                                                                                                                                                                                                                                                                                                                                                                                                                                                                                                                                                                                                                                                                                                                                                                                                                                                                                                                                                                                                                                                                                                                                                                                                                                                                                                                                                     |               |   |                                    |  |  |         |      |      |        |  |          |      |      |        |  |            |      |      |        |  |                          |  |         |            |   |                        |  |    |   |      |              |  |    |   |      |             |  |    |   |      |                                   |  |    |   |      |                                     |  |    |    |      |                                         |  |    |    |      |  |  |    |    |      |                 |  |  |  |  |               |  |       |       |  |           |  |       |       |  |                |  |       |       |  |                            |  |  |  |  |  |  |             |            |  |               |       |       |       |       |              |       |       |       |       |                                                                                                                                                                                                                                                                                                                                                                                                                                                                                                                                                                                                                                                             |
| verbal IQ                                                                                                                       |                                                                                                | 103.5                                                                                                                                                                                                                                                    | 107.2                                                                                                                                                                                                                                                                                                                                                                                                                                                                                                                                                                                                                                                                                                                                                                                                                                                                                                                                                                                                                                                                                                                                                                                                                                                                                                                                                                                                                                                                                                                                                                                                                                                                                                                                                                                                                                                                                     |               |   |                                    |  |  |         |      |      |        |  |          |      |      |        |  |            |      |      |        |  |                          |  |         |            |   |                        |  |    |   |      |              |  |    |   |      |             |  |    |   |      |                                   |  |    |   |      |                                     |  |    |    |      |                                         |  |    |    |      |  |  |    |    |      |                 |  |  |  |  |               |  |       |       |  |           |  |       |       |  |                |  |       |       |  |                            |  |  |  |  |  |  |             |            |  |               |       |       |       |       |              |       |       |       |       |                                                                                                                                                                                                                                                                                                                                                                                                                                                                                                                                                                                                                                                             |
| performance IQ                                                                                                                  |                                                                                                | 105.3                                                                                                                                                                                                                                                    | 108.8                                                                                                                                                                                                                                                                                                                                                                                                                                                                                                                                                                                                                                                                                                                                                                                                                                                                                                                                                                                                                                                                                                                                                                                                                                                                                                                                                                                                                                                                                                                                                                                                                                                                                                                                                                                                                                                                                     |               |   |                                    |  |  |         |      |      |        |  |          |      |      |        |  |            |      |      |        |  |                          |  |         |            |   |                        |  |    |   |      |              |  |    |   |      |             |  |    |   |      |                                   |  |    |   |      |                                     |  |    |    |      |                                         |  |    |    |      |  |  |    |    |      |                 |  |  |  |  |               |  |       |       |  |           |  |       |       |  |                |  |       |       |  |                            |  |  |  |  |  |  |             |            |  |               |       |       |       |       |              |       |       |       |       |                                                                                                                                                                                                                                                                                                                                                                                                                                                                                                                                                                                                                                                             |
| <i>Age 14 correlations</i>                                                                                                      |                                                                                                |                                                                                                                                                                                                                                                          |                                                                                                                                                                                                                                                                                                                                                                                                                                                                                                                                                                                                                                                                                                                                                                                                                                                                                                                                                                                                                                                                                                                                                                                                                                                                                                                                                                                                                                                                                                                                                                                                                                                                                                                                                                                                                                                                                           |               |   |                                    |  |  |         |      |      |        |  |          |      |      |        |  |            |      |      |        |  |                          |  |         |            |   |                        |  |    |   |      |              |  |    |   |      |             |  |    |   |      |                                   |  |    |   |      |                                     |  |    |    |      |                                         |  |    |    |      |  |  |    |    |      |                 |  |  |  |  |               |  |       |       |  |           |  |       |       |  |                |  |       |       |  |                            |  |  |  |  |  |  |             |            |  |               |       |       |       |       |              |       |       |       |       |                                                                                                                                                                                                                                                                                                                                                                                                                                                                                                                                                                                                                                                             |
|                                                                                                                                 |                                                                                                | Word attack                                                                                                                                                                                                                                              | Arithmetic                                                                                                                                                                                                                                                                                                                                                                                                                                                                                                                                                                                                                                                                                                                                                                                                                                                                                                                                                                                                                                                                                                                                                                                                                                                                                                                                                                                                                                                                                                                                                                                                                                                                                                                                                                                                                                                                                |               |   |                                    |  |  |         |      |      |        |  |          |      |      |        |  |            |      |      |        |  |                          |  |         |            |   |                        |  |    |   |      |              |  |    |   |      |             |  |    |   |      |                                   |  |    |   |      |                                     |  |    |    |      |                                         |  |    |    |      |  |  |    |    |      |                 |  |  |  |  |               |  |       |       |  |           |  |       |       |  |                |  |       |       |  |                            |  |  |  |  |  |  |             |            |  |               |       |       |       |       |              |       |       |       |       |                                                                                                                                                                                                                                                                                                                                                                                                                                                                                                                                                                                                                                                             |
| Pre-pregnancy                                                                                                                   | -0.15                                                                                          | p<.01                                                                                                                                                                                                                                                    | -0.15                                                                                                                                                                                                                                                                                                                                                                                                                                                                                                                                                                                                                                                                                                                                                                                                                                                                                                                                                                                                                                                                                                                                                                                                                                                                                                                                                                                                                                                                                                                                                                                                                                                                                                                                                                                                                                                                                     | p<.05         |   |                                    |  |  |         |      |      |        |  |          |      |      |        |  |            |      |      |        |  |                          |  |         |            |   |                        |  |    |   |      |              |  |    |   |      |             |  |    |   |      |                                   |  |    |   |      |                                     |  |    |    |      |                                         |  |    |    |      |  |  |    |    |      |                 |  |  |  |  |               |  |       |       |  |           |  |       |       |  |                |  |       |       |  |                            |  |  |  |  |  |  |             |            |  |               |       |       |       |       |              |       |       |       |       |                                                                                                                                                                                                                                                                                                                                                                                                                                                                                                                                                                                                                                                             |
| In pregnancy                                                                                                                    | -0.12                                                                                          | p<.05                                                                                                                                                                                                                                                    | -0.15                                                                                                                                                                                                                                                                                                                                                                                                                                                                                                                                                                                                                                                                                                                                                                                                                                                                                                                                                                                                                                                                                                                                                                                                                                                                                                                                                                                                                                                                                                                                                                                                                                                                                                                                                                                                                                                                                     | p<.05         |   |                                    |  |  |         |      |      |        |  |          |      |      |        |  |            |      |      |        |  |                          |  |         |            |   |                        |  |    |   |      |              |  |    |   |      |             |  |    |   |      |                                   |  |    |   |      |                                     |  |    |    |      |                                         |  |    |    |      |  |  |    |    |      |                 |  |  |  |  |               |  |       |       |  |           |  |       |       |  |                |  |       |       |  |                            |  |  |  |  |  |  |             |            |  |               |       |       |       |       |              |       |       |       |       |                                                                                                                                                                                                                                                                                                                                                                                                                                                                                                                                                                                                                                                             |

|                                                                                                        |                                                                    |                                                                                                                                                                                                                                        |                                                                                                                                                                                                                                                                                                                                                                                                           |                                                                                                                                                                                                                                                                                                                                                                                                                                                                                                                                                                                                                                                                                                                      |
|--------------------------------------------------------------------------------------------------------|--------------------------------------------------------------------|----------------------------------------------------------------------------------------------------------------------------------------------------------------------------------------------------------------------------------------|-----------------------------------------------------------------------------------------------------------------------------------------------------------------------------------------------------------------------------------------------------------------------------------------------------------------------------------------------------------------------------------------------------------|----------------------------------------------------------------------------------------------------------------------------------------------------------------------------------------------------------------------------------------------------------------------------------------------------------------------------------------------------------------------------------------------------------------------------------------------------------------------------------------------------------------------------------------------------------------------------------------------------------------------------------------------------------------------------------------------------------------------|
| <p>Tolo, 1993;<br/>USA;<br/>Cohort study</p> <p>Selection=3<br/>Comparability=2<br/>Outcome=3</p>      | <p>1982-83<br/>237 1 or<br/>more<br/>binges, 472<br/>no binges</p> | <p>Retrospectively by<br/>questionnaire at 6<br/>months gestation; birth<br/>outcomes from<br/>medical records;<br/>IUGR computed by<br/>regressing birthweight<br/>on gestational age and<br/>adding residuals to<br/>sample mean</p> | <p>Outcome Any No Difference in means<br/>binge binge (95% CI)</p> <p>Birth-<br/>weight (g) 3561 3579 -18 (-95, 59)</p> <p>Birth<br/>length (cm) 51.2 51.0 0.2 (-0.2, 0.6)</p> <p>Head circum-<br/>ference (cm) 34.5 34.6 -0.1 (-0.4, 0.2)</p> <p>Intrauterine<br/>growth (g) 3537 3591 -54 (-122, 14)</p>                                                                                                | <p>Population source was HMO, consecutive<br/>sample overwhelmingly white and well<br/>educated; not truly representative but<br/>homogeneous and therefore confounding less<br/>likely. Excluded regular drinkers from sample.<br/>Questionnaire was validated in pilot study but<br/>had 74% response rate, no information about<br/>non-respondents. Results were unadjusted,<br/>however, adjusting for confounders made little<br/>difference. Similarly, number of binge episodes<br/>(binge defined as 2.5oz on a single occasion in<br/>first 6 months of pregnancy) and timing<br/>(whether in month before pregnancy or in 1<sup>st</sup>/2<sup>nd</sup><br/>trimester) made no difference to results.</p> |
| <p>Whitehead, 2003;<br/>USA;<br/>Cohort study</p> <p>Selection=4<br/>Comparability=2<br/>Outcome=2</p> | <p>1996-99<br/>50,461<br/>women</p>                                | <p>Retrospectively by<br/>postpartum<br/>questionnaire with<br/>telephone follow-up of<br/>non-responders;<br/>outcomes from birth<br/>certificate data</p>                                                                            | <p>%SGA RR (95% CI)</p> <p><i>3 mths before pregnancy</i></p> <p>Bingeing 8.1 1.06 (0.94, 1.21)</p> <p>No bingeing 7.6</p> <p><i>last 3 mths of pregnancy</i></p> <p>Bingeing 9.4 1.20 (0.78, 1.87)</p> <p>No bingeing 7.8</p> <p>per binge relative to non-drinkers<br/>OR (95% CI)</p> <p><i>3 mths before pregnancy</i> 0.98 (0.97, 1.00)</p> <p><i>last 3 mths of pregnancy</i> 0.99 (0.90, 1.09)</p> | <p>SGA defined as birthweight &lt;10<sup>th</sup> percentile for<br/>gestational age according to race and parity<br/>specific standards. Bingeing defined as 5 or<br/>more drinks on a single occasion. 76% response<br/>rate but over-representation of SGA babies. ORs<br/>adjusted for maternal age, education, marital<br/>staus, pre-pregnancy weight, public assistance,<br/>state of residence, smoking before pregnancy.</p>                                                                                                                                                                                                                                                                                |



**Abbreviations used in table**

%ile percentile

adj adjusted

AN antenatal

CI confidence interval

GA gestational age

HMO Health Maintenance Organisation

RR relative risk

SD standard deviation

SES socioeconomic status

SGA small for gestational age

unadj unadjusted

\*  $p < 0.05$
